# Supplementary material for: GLK-IKKβ signaling induces dimerization and translocation of the AhR-RORγt complex in IL-17A induction and autoimmune disease
Source: PubMed Central journal article supplement (PMC6135549; doi:10.1126/sciadv.aat5401), 2018-09-12
Supplement: aat5401_SM.pdf [file aat5401_SM.pdf]

## Supplementary Materials for

### **GLK-IKK $\beta$ signaling induces dimerization and translocation of the AhR-ROR $\gamma$ t complex in IL-17A induction and autoimmune disease**

Huai-Chia Chuang, Ching-Yi Tsai, Chia-Hsin Hsueh, Tse-Hua Tan\*

\*Corresponding author. Email: ttan@nhri.org.tw

Published 12 September 2018, *Sci. Adv.* **4**, eaat5401 (2018)

DOI: 10.1126/sciadv.aat5401

#### **This PDF file includes:**

- Fig. S1. Normal T cell and B cell development in Lck-GLK Tg mice.
- Fig. S2. Inflammatory phenotypes and enhanced T<sub>H</sub>17 differentiation in Lck-GLK Tg mice.
- Fig. S3. Autoimmune responses in Lck-GLK Tg mice are abolished by IL-17A deficiency.
- Fig. S4. GLK transgene does not regulate IL-23 receptor expression, STAT3 phosphorylation, and ROR $\gamma$ t-binding element at the -120 region of the IL-17A promoter.
- Fig. S5. PKC $\theta$  controls Ser<sup>36</sup> phosphorylation-mediated AhR nuclear translocation and AhR-mediated autoimmune responses.
- Fig. S6. PKC $\theta$  directly interacts with AhR in the cytoplasm of Lck-GLK T cells.
- Fig. S7. Autoimmune responses in Lck-GLK Tg mice are reduced by PKC $\theta$  KO.
- Fig. S8. TCR signaling induces in vivo interaction between AhR and ROR $\gamma$ t.
- Fig. S9. Schematic model of AhR/ROR $\gamma$ t-mediated IL-17A transcription in T cells of Lck-GLK Tg mice with different gene-KO backgrounds.
- Table S1. Transcription factors of NF- $\kappa$ B-mediated cytokines.
- References (58, 59)

**Supplementary Figures:**

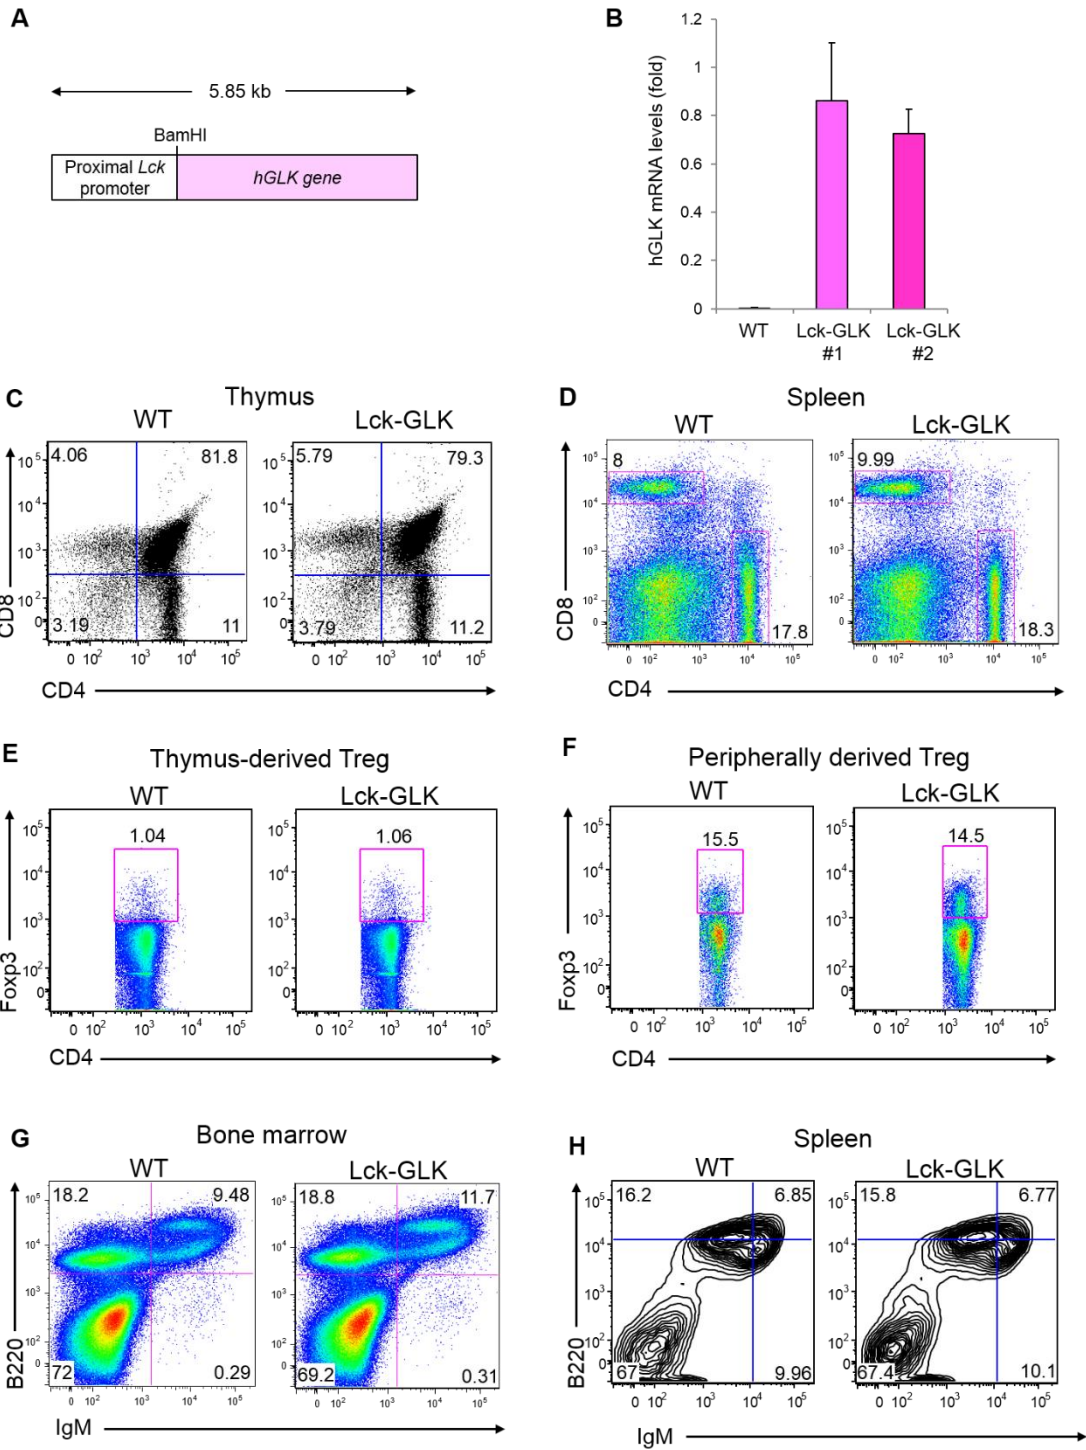

**Fig. S1. Normal T cell and B cell development in Lck-GLK Tg mice.** (A) Schematic diagram of the Lck-GLK construction. (B) Real-time PCR analyses of transgenic human GLK (hGLK) mRNA levels in murine splenic T cells from 5 mice per group. The expression levels of hGLK were normalized to Srp72 levels. The fold changes are presented relative to the value of wild-type mice. Means  $\pm$  SEM are shown. WT, wild-type littermate controls; Lck-GLK, T-cell-specific GLK transgenic mice. #1 denotes the Lck-GLK Tg mouse line 1. #2 denotes the Lck-GLK Tg mouse line 2. (C-F) Flow cytometry analyses of T cells (C, D) and Treg cells (E, F) from the thymus, spleen, or peripheral blood of 5-week-old wild-type or Lck-GLK transgenic mice. (G and H) Flow cytometry analyses of B220<sup>+</sup> B cells from the bone marrow (G) or spleen (H) of wild-type or Lck-GLK transgenic mice. WT, wild-type littermate controls; Lck-GLK, T-cell-specific GLK transgenic mice. Data shown are representatives of three independent experiments.

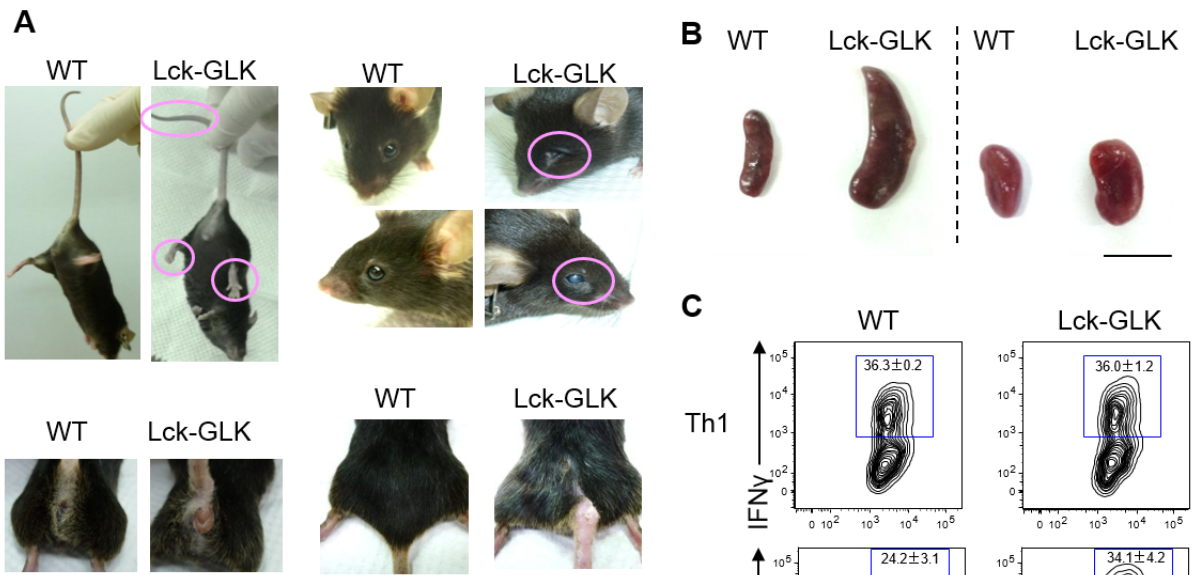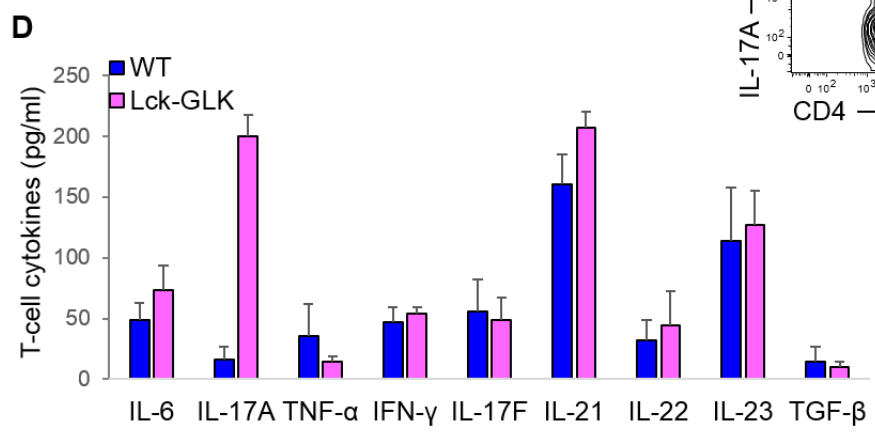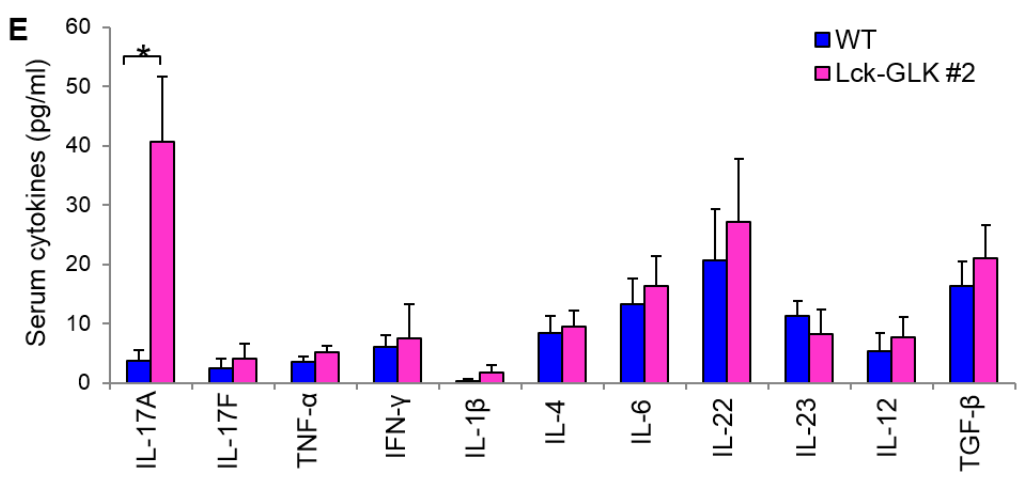

**Fig. S2. Inflammatory phenotypes and enhanced T<sub>H</sub>17 differentiation in Lck-GLK Tg mice.** (A) Inflammatory phenotypes of 16-week-old Lck-GLK transgenic mice. The inflammatory phenotypes include paralyses of the hind-limb and tail, clouding of the eye, and symptoms of proctitis and dermatitis. (B) Enlargement of the spleen (left panel) and kidney (right panel) in 16-week-old Lck-GLK transgenic mice. Bar, 1 cm. WT, wild-type littermate controls; Lck-GLK, Lck-GLK transgenic mice. (C) Th17 but not Th1 differentiation *in vitro* is enhanced by GLK transgene. Flow cytometry of IFN- $\gamma$ -producing and IL-17A-producing CD4<sup>+</sup> T cells. Data are presented as mean  $\pm$  SEM. Numbers inside outlined areas indicate percent cells in each subpopulation. Data were collected with FACSCanto II (BD Biosciences) and analyzed using FlowJo software. (D) The cytokine levels in T-cell supernatants were determined using ELISA assays. Primary splenic T cells from wild-type or Lck-GLK Tg mice were cultured for 72 h without any stimulation. Means  $\pm$  SD are shown. n = 3 per group. (E) The serum levels of cytokines in 4-week-old mice were determined using ELISA assays. WT, n = 10; Lck-GLK, n = 7. WT, wild-type littermate controls; Lck-GLK, T-cell-specific GLK transgenic mice. #2 denotes the Lck-GLK Tg mouse line 2. \*, P value < 0.05 (two-tailed Student's t-test).

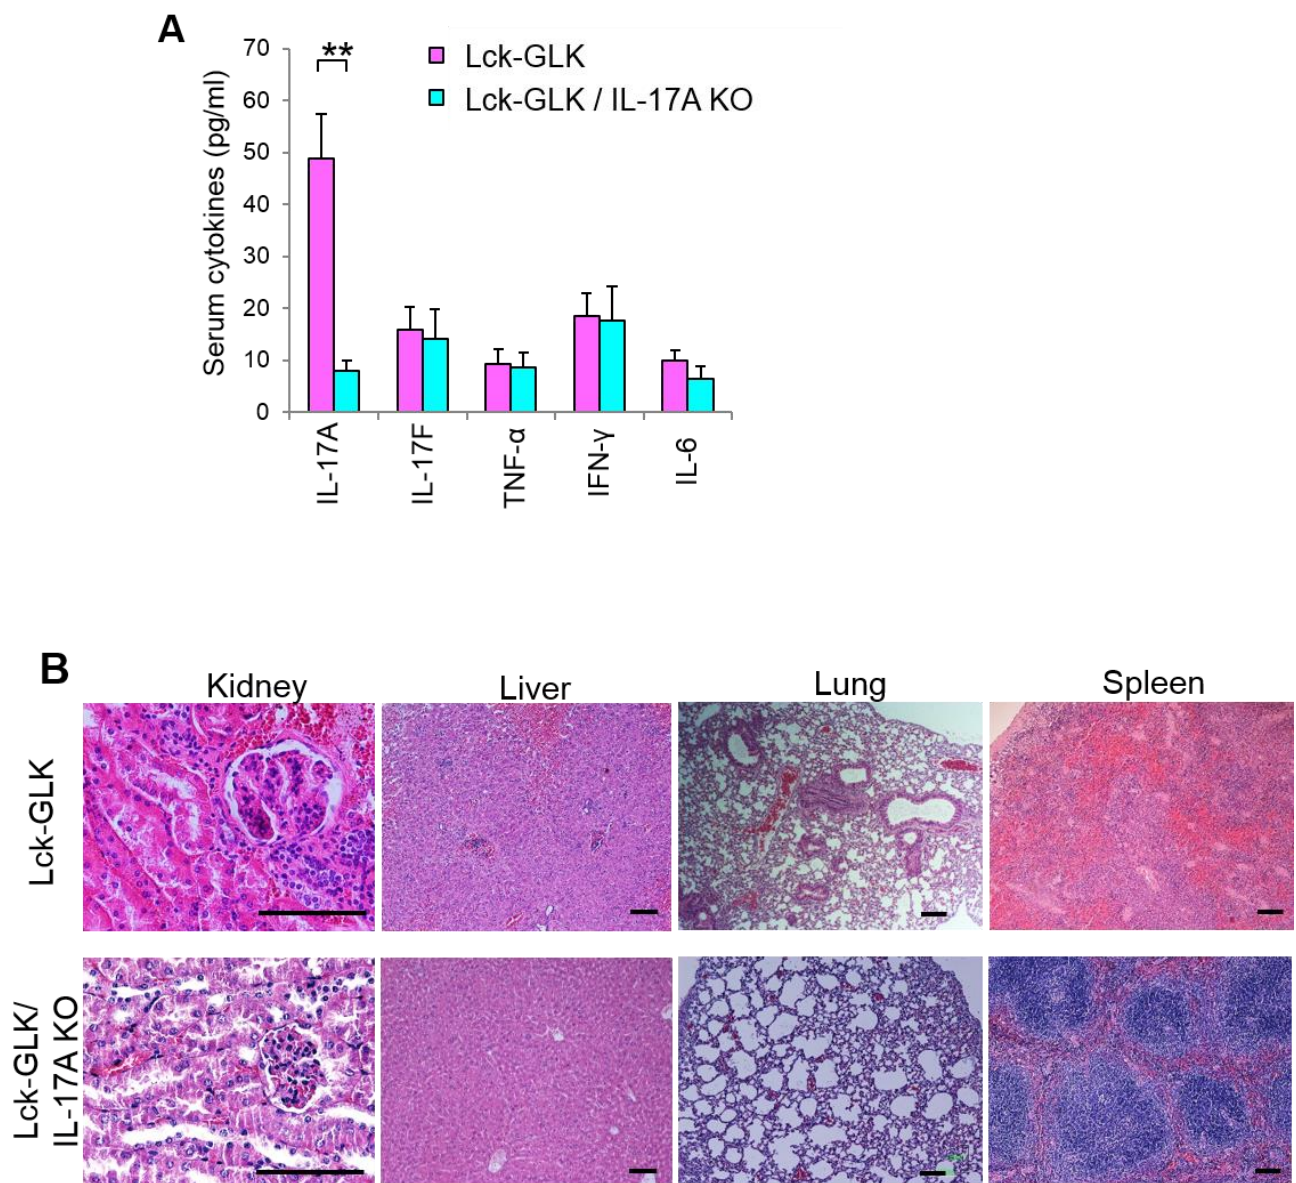

**Fig. S3. Autoimmune responses in Lck-GLK Tg mice are abolished by IL-17A deficiency.** (A) The serum levels of cytokines in 4-week-old Lck-GLK transgenic and Lck-GLK/IL-17A KO mice were determined by ELISA assays.  $n = 6$  per group. Means  $\pm$  SEM are shown. \*\*,  $P$  value  $< 0.01$  (two-tailed Student's  $t$ -test). (B) Hematoxylin and eosin-stained sections of indicated organs from 16-week-old mice. Bar, 100  $\mu$ m. Lck-GLK, T-cell-specific GLK transgenic mice; Lck-GLK/IL-17A KO, Lck-GLK transgenic mice bred with IL-17A-deficient mice.

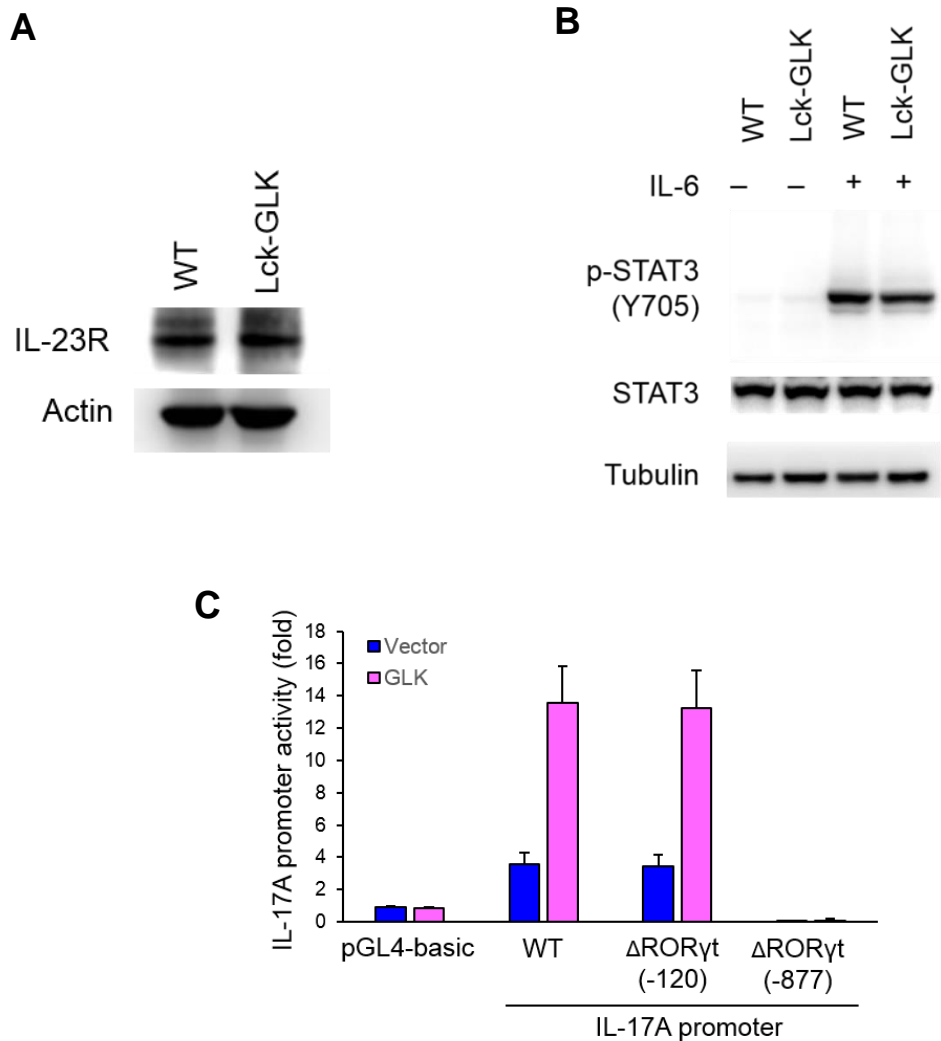

**Fig. S4. GLK transgene does not regulate IL-23 receptor expression, STAT3 phosphorylation, and ROR $\gamma$ t-binding element at the -120 region of the IL-17A promoter.** (A) Immunoblotting analyses of IL-23 receptor (IL-23R) and Actin in splenic T cells isolated from wild-type or Lck-GLK transgenic mice. (B) Immunoblotting analyses of phosphorylated STAT3 (Tyr-705), STAT3, and Tubulin in unstimulated or IL-6 (1  $\mu$ g/ml)-stimulated splenic T cells isolated from wild-type or Lck-GLK transgenic mice. WT, wild-type littermate controls; Lck-GLK, T-cell-specific GLK transgenic mice. Data shown (a and b) are representatives of three independent experiments. (C) Luciferase activity of IL-17A reporter assays in Jurkat T cells co-transfected with empty vector or GLK plasmid plus the IL-17A promoter construct containing a mutated binding element for either ROR $\gamma$ t (-120) or ROR $\gamma$ t (-877). Means  $\pm$  SEM of three independent experiments are shown.

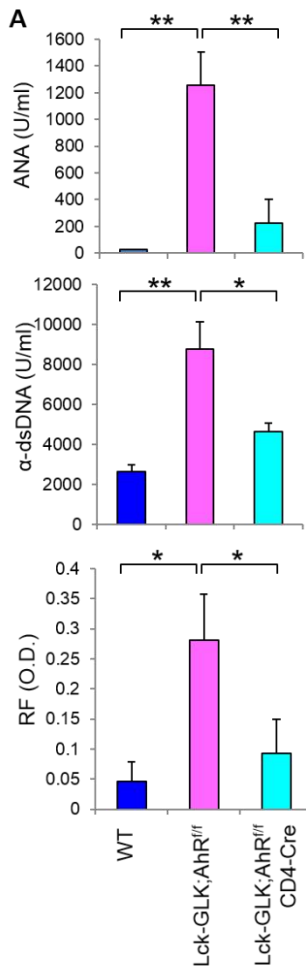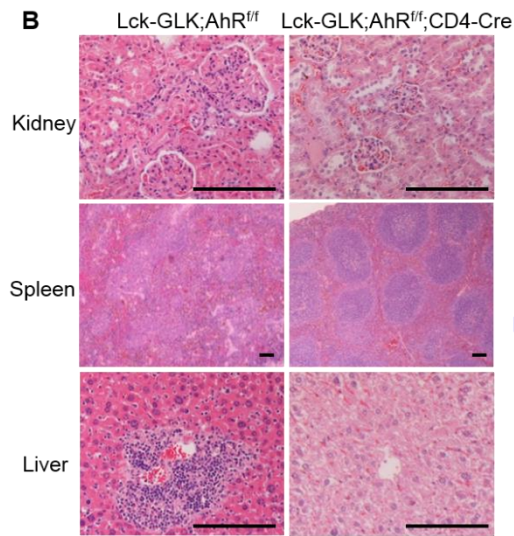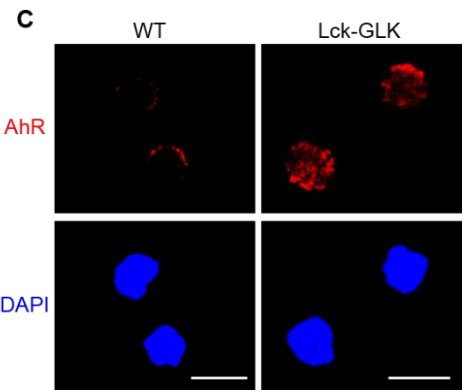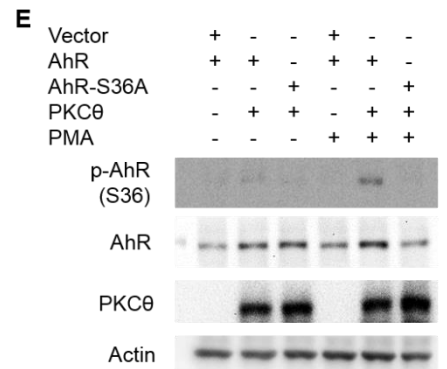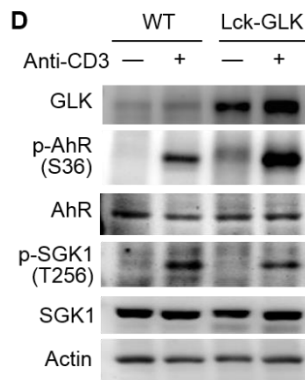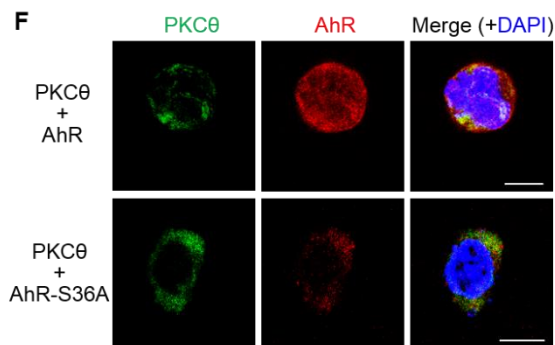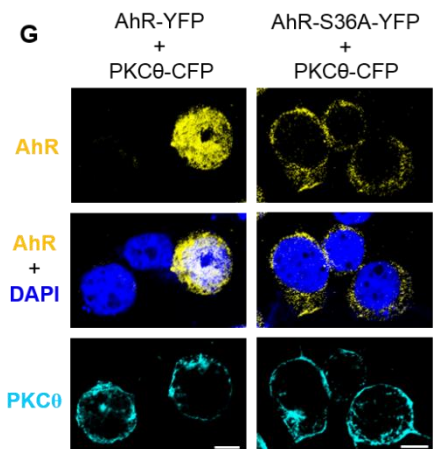



**Fig. S5. PKC $\theta$  controls Ser<sup>36</sup> phosphorylation-mediated AhR nuclear translocation and AhR-mediated autoimmune responses.** (A and B) Attenuation of autoimmune responses in Lck-GLK transgenic mice by AhR conditional knockout. The serum levels of autoantibodies from 16-week-old mice were determined by ELISA assays (A). n = 8 per group. Means  $\pm$  SEM are shown. Hematoxylin and eosin-stained sections of indicated organs from 16-week-old mice (B). (C) Confocal microscopy analyses of subcellular localization of AhR in murine splenic T cells without any stimulation. An anti-AhR antibody (#sc-5579, Santa Cruz) was used. Original magnification,  $\times$  630; bar, 10  $\mu$ m. (D) Immunoblotting analyses of phosphorylated AhR (Ser-36), phosphorylated SGK1 (Thr-256), AhR, SGK1, GLK, and Actin in primary splenic T cells of wild-type and Lck-GLK transgenic mice. (E) Antibody specificity of the anti-phospho-AhR (Ser-36) was demonstrated by immunoblotting using HEK293T cells co-transfected with Myc-tagged PKC $\theta$  plus either HA-tagged AhR WT or AhR-S36A mutant. (F) Confocal microscopy analyses of subcellular localization of AhR and PKC $\theta$  in Jurkat T cells co-transfected with PKC $\theta$  plus either HA-tagged AhR WT or AhR-S36A mutant. Original magnification,  $\times$  630; bar, 10  $\mu$ m. (G) Confocal microscopy analyses of subcellular localization of CFP-tagged PKC $\theta$  and either YFP-tagged AhR or YFP-tagged AhR-S36A mutant in co-transfected HEK293T cells stimulated with PMA. Original magnification,  $\times$  630; bar, 10  $\mu$ m. Data shown are representatives of three independent experiments.

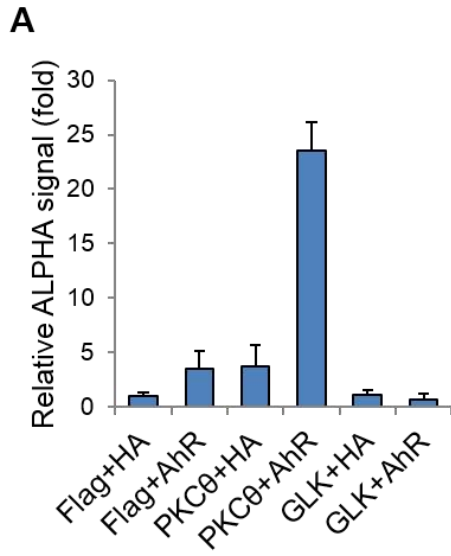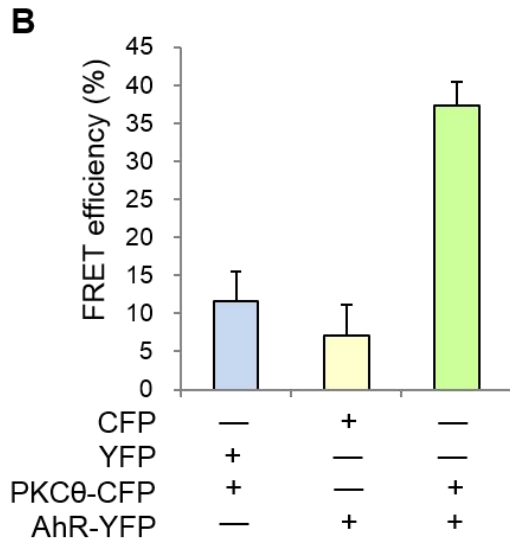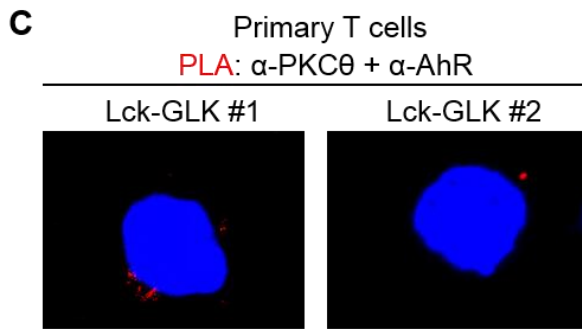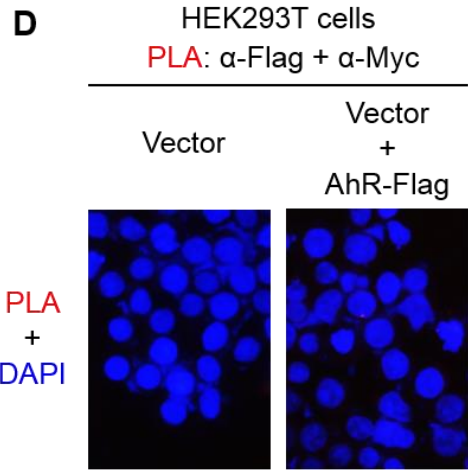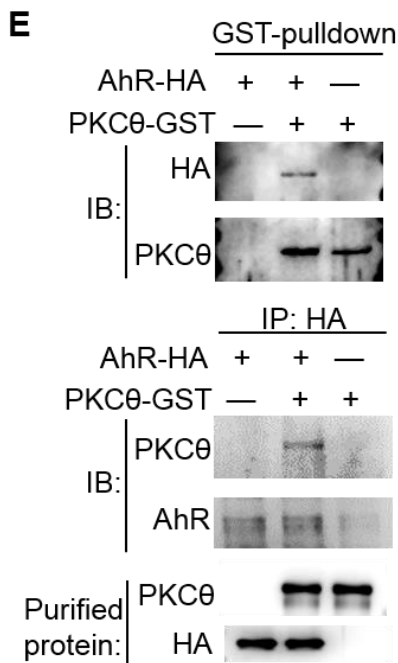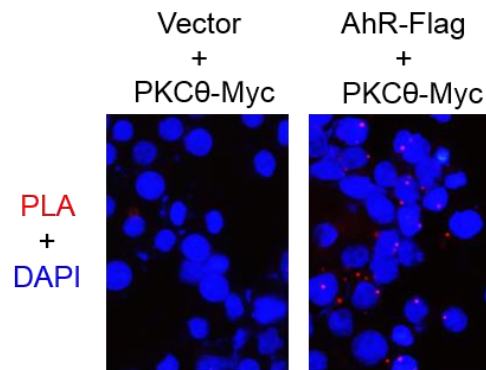

**Fig. S6. PKC $\theta$  directly interacts with AhR in the cytoplasm of Lck-GLK T cells.** (A) Signals of the interaction (< 200 nm) between HA-AhR and Flag-PKC $\theta$  in lysates of HEK293T cells determined by amplified luminescent proximity homogeneous assays (ALPHA). Means  $\pm$  SEM are shown. (B) Fluorescence resonance energy transfer (FRET) analysis of the direct interaction (1-10 nm) between CFP-tagged PKC $\theta$  and YFP-tagged AhR in live Jurkat T cells. Means  $\pm$  SEM are shown. (C) Confocal microscopy analyses of proximity ligation assays (PLA) signals from the interaction (< 40 nm) between endogenous PKC $\theta$  and AhR in two different peripheral blood T cells (#1 and #2) of Lck-GLK Tg mice. Each red dot represents for a direct interaction. Images were captured with 630 $\times$  original magnification by Leica TCS SP5 II confocal microscope. Cell nucleus was stained with DAPI. (D) Proximity ligation assays (PLA) of interaction between Myc-tagged PKC $\theta$  and Flag-tagged AhR in HEK293T cells. Images were captured with 400 $\times$  original magnification by Leica DM2500 fluorescence microscope. Cell nucleus was stained with DAPI. (E) *In vitro* binding assays of purified HA-tagged AhR and GST-tagged PKC $\theta$  proteins. WT, wild-type mice; Lck-GLK, T-cell-specific GLK transgenic mice. Data shown are representatives of three independent experiments.

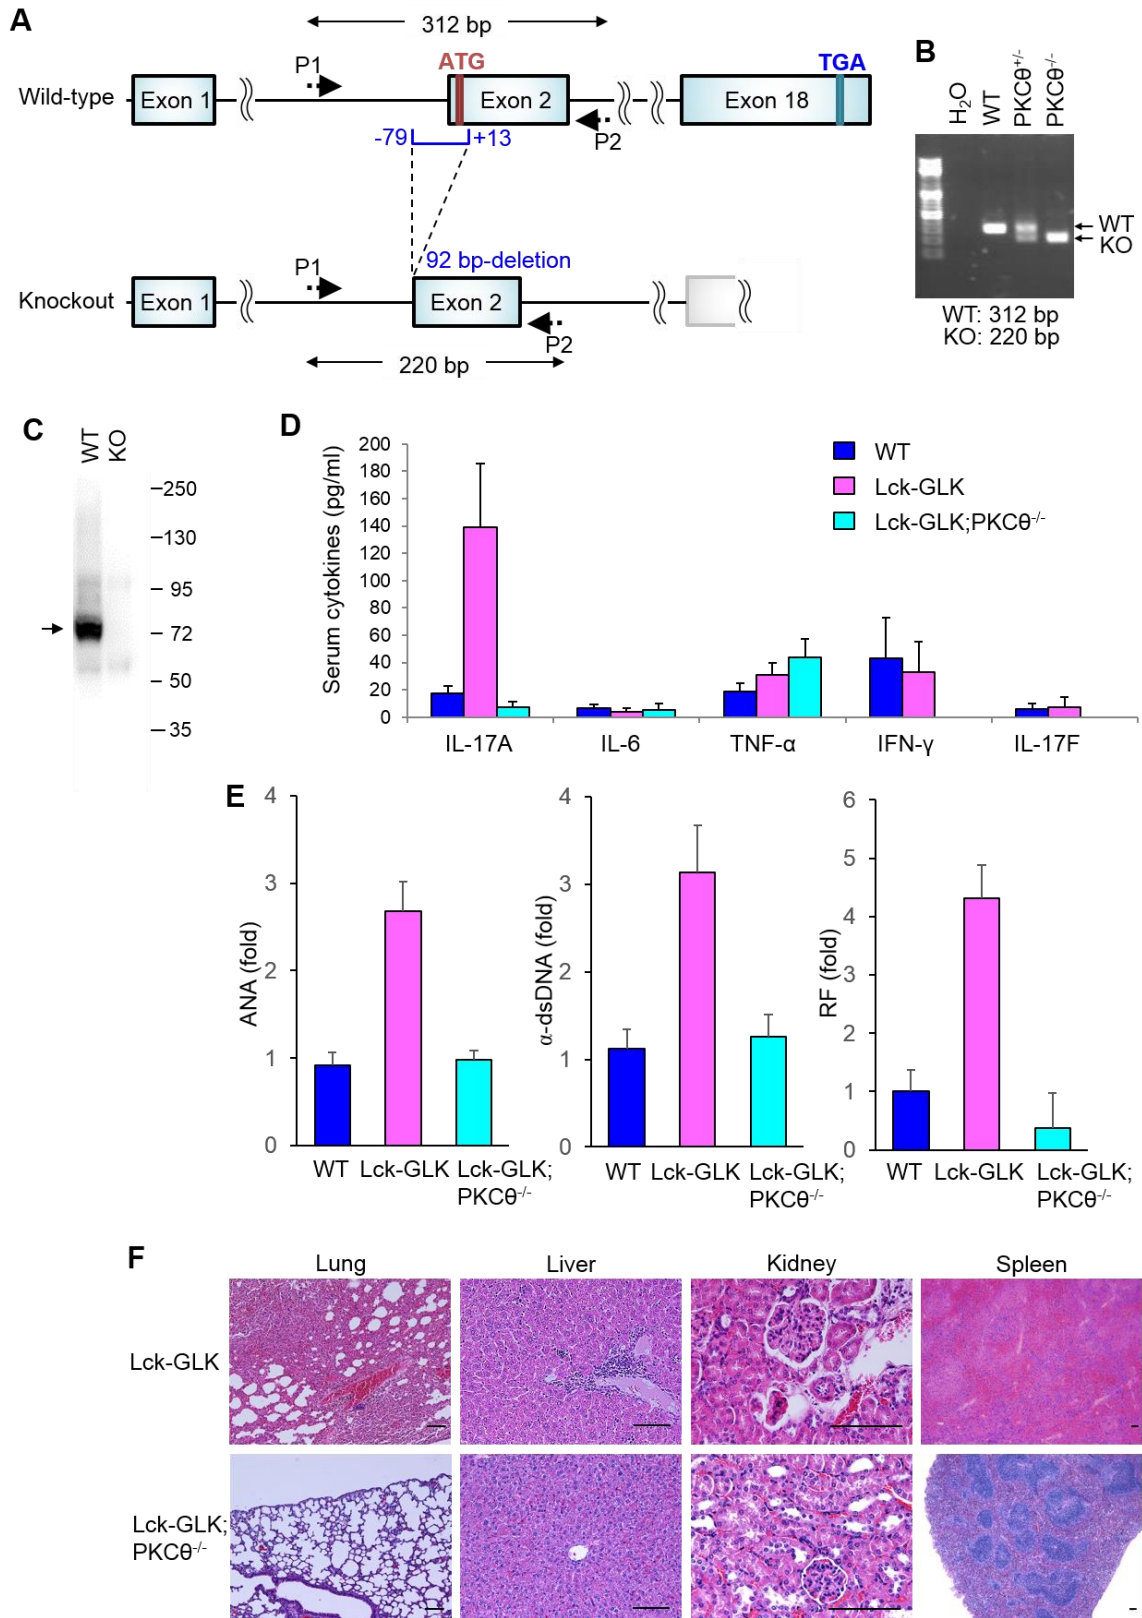

**Fig. S7. Autoimmune responses in Lck-GLK Tg mice are reduced by PKC $\theta$  KO.**

(A to C) Generation and characterization of PKC $\theta$  knockout mice. Schematic diagram of the mouse PKC $\theta$  wild-type allele and the targeted PKC $\theta$  mutant allele (A). PKC $\theta$  knockout mice were generated by TALEN-mediated gene targeting. The deletion of 92 bp including the translation initiation codon (AUG) results in a 33 amino acid frame-shift mutant. P1 and P2, the primers for PCR. See the Methods for the details. PCR analyses of PKC $\theta$  wild-type and mutant allele using the genomic DNAs from mouse tails (B). The PCR product of the upper band (312 bp) denotes wild-type (WT) allele, and the lower band (220 bp) denotes PKC $\theta$  mutant allele. Immunoblotting of PKC $\theta$  expression in purified splenic T cells of wild-type (WT) or PKC $\theta$  knockout (KO) mice (C). (D to F) Reduction of GLK-induced autoimmune responses by PKC $\theta$  knockout. The serum levels of cytokines (D) and autoantibodies (E) in 16-week-old mice were determined by ELISA assays.  $n = 5$  per group. Means  $\pm$  SEM are shown. The autoantibody levels are presented relative to the value from one of wild-type mice. Hematoxylin and eosin-stained sections of indicated organs from 16-week-old mice (F). Bar, 100  $\mu$ m. WT, wild-type littermate controls; Lck-GLK, T-cell-specific GLK transgenic mice; Lck-GLK;PKC $\theta$ <sup>-/-</sup>, Lck-GLK transgenic mice bred with PKC $\theta$  knockout mice. ANA, anti-nuclear antibody;  $\alpha$ -dsDNA, anti-dsDNA antibody; RF, rheumatoid factor. Data shown are representatives of three independent experiments.

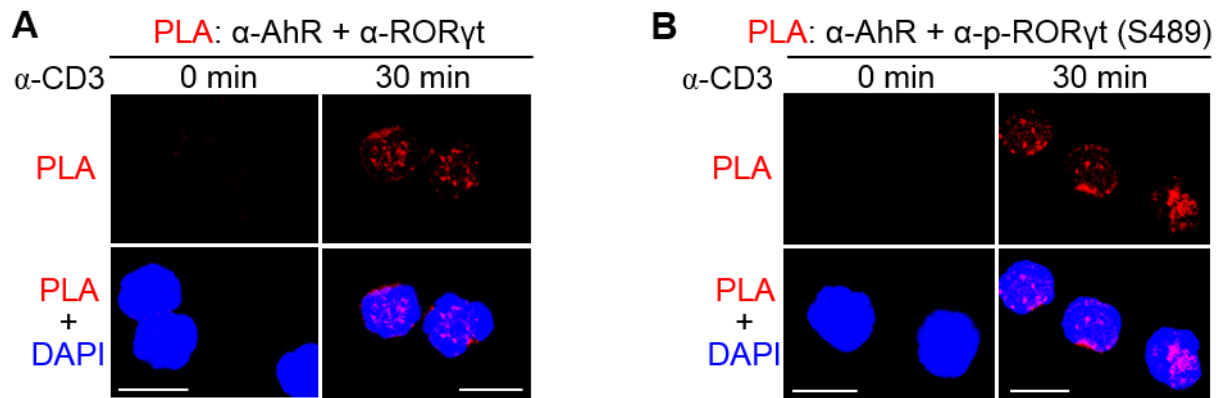

**Fig. S8. TCR signaling induces in vivo interaction between AhR and ROR $\gamma$ t.** (A and B) Confocal microscopy analyses of proximity ligation assays (PLA) for the interaction between endogenous AhR and ROR $\gamma$ t (A) or between endogenous AhR and phosphorylated ROR $\gamma$ t (B) in murine primary T cells. T cells were stimulated with anti-CD3 antibodies plus streptavidin (3  $\mu$ g each per ml). Each red dot represents for a direct interaction. T-cell nucleus was stained with DAPI (blue color). Original magnification,  $\times$  630; bar, 10  $\mu$ m.

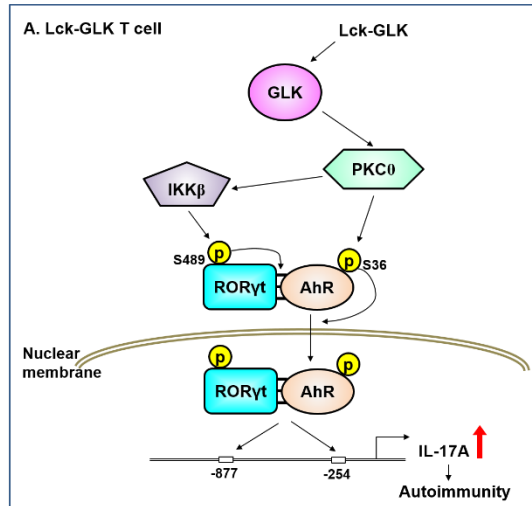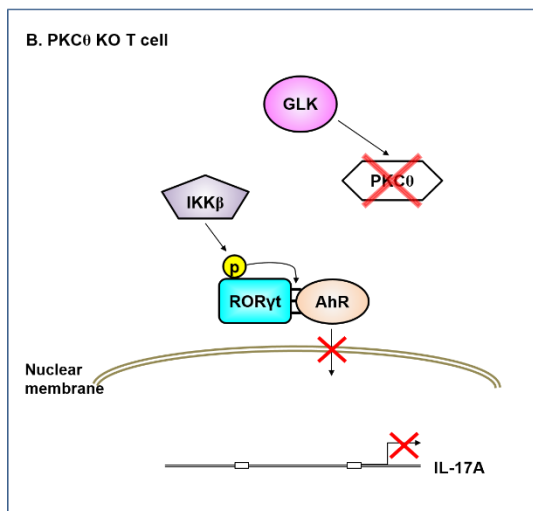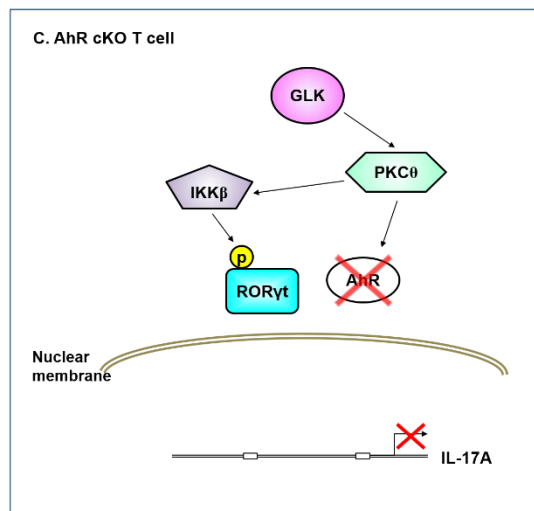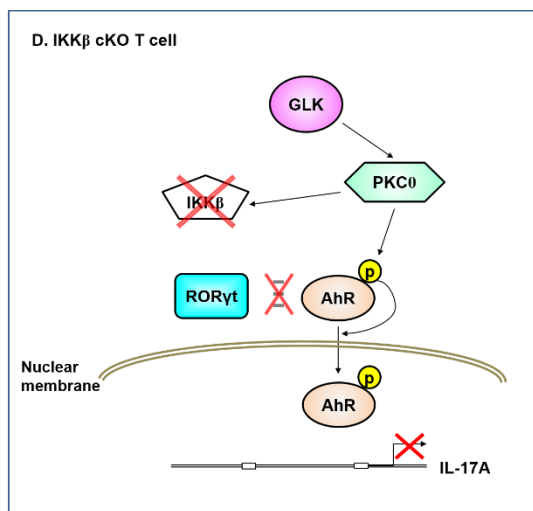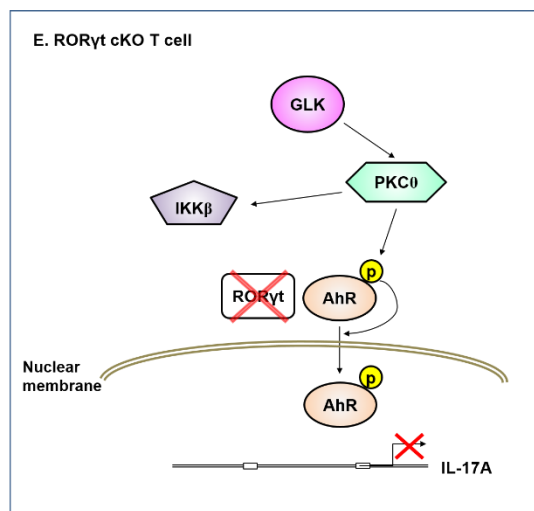

**Fig. S9. Schematic model of AhR/ROR $\gamma$ t-mediated IL-17A transcription in T cells of Lck-GLK Tg mice with different gene-KO backgrounds.** (A) GLK overexpression in T cells of T-cell-specific GLK transgenic (Lck-GLK Tg) mice induces AhR Ser-36 phosphorylation through PKC $\theta$  and also induces ROR $\gamma$ t Ser-489 phosphorylation through IKK $\beta$ . Once ROR $\gamma$ t is phosphorylated, ROR $\gamma$ t directly interacts with AhR. Phosphorylated AhR is responsible for transporting ROR $\gamma$ t into cell nucleus. The ROR $\gamma$ t-AhR complex binds to both the ROR $\gamma$ t-binding element (-877~ -872) and AhR-binding element (-254~ -249) of the IL-17A promoter, leading to induction of IL-17A transcription and subsequent IL-17A-mediated autoimmune responses. (B) In T cells of Lck-GLK Tg plus AhR conditional knockout (cKO) mice, ROR $\gamma$ t cannot be transported into the nucleus. (C) In T cells of Lck-GLK Tg plus PKC $\theta$  knockout mice, AhR Ser-36 is not phosphorylated and AhR localizes exclusively in the cytoplasm. Phosphorylated ROR $\gamma$ t interacts with AhR, but cannot be transported into the nucleus. (D) In T cells of Lck-GLK Tg plus IKK $\beta$  conditional knockout (cKO) mice, ROR $\gamma$ t Ser-489 is not phosphorylated. Unphosphorylated ROR $\gamma$ t cannot interact with AhR, thus, cannot be transported into the nucleus by AhR. In contrast, only AhR translocates into the nucleus. In IKK $\beta$  cKO T cells, IL-17A induction is abolished. TCR-induced production of multiple cytokines (IL-2, IFN- $\gamma$ , IL-4, IL-6, and TNF- $\alpha$ ) are reduced in IKK $\beta$  cKO T cells due to inactivation of NF- $\kappa$ B. (E) In T cells of Lck-GLK Tg plus ROR $\gamma$ t cKO mice, AhR is expected to translocate into the nucleus. In T cells of ROR $\gamma$ t cKO mice, only IL-17A production is abolished, whereas NF- $\kappa$ B-mediated cytokines (IL-2, IFN- $\gamma$ , IL-4, IL-6, and TNF- $\alpha$ ) are not affected.



**Table S1. Transcription factors of NF- $\kappa$ B-mediated cytokines.**

| <b>Cytokines</b> | <b>Transcription factors</b>                         | <b>References</b> |
|------------------|------------------------------------------------------|-------------------|
| IL-2             | NF- $\kappa$ B, NFAT1, AP-1                          | (48, 58)          |
| IFN- $\gamma$    | NF- $\kappa$ B, NFAT1, AP-1, T-bet, STAT1, STAT4     | (48, 58, 59)      |
| IL-4             | NF- $\kappa$ B, NFAT1, Egr-1, JunB, SATB1, IRF4/8    | (48, 58)          |
| IL-6             | NF- $\kappa$ B, NFAT1, IRF-1, C/EBP $\beta$ (NF-IL6) | (48)              |
| TNF- $\alpha$    | NF- $\kappa$ B, NFAT1, ATF-2, Jun                    | (48)              |
